# Supplementary material
Source: publisher figshare collection journal article supplement (https://sage.figshare.com/ndownloader/files/36009548)
Supplement: Supplementary file 1 [file 36009548]

Prestudy body weights (kg) of males and females by origin

|  | Male | | | Female | | |
| --- | --- | --- | --- | --- | --- | --- |
|  | Cambodian | Chinese | Vietnamese | Cambodian | Chinese | Vietnamese |
| N | 282 | 750 | 122 | 271 | 741 | 120 |
| Min | 2 | 1.96 | 2.2 | 1.68 | 1.87 | 1.66 |
| Max | 5.15 | 4.75 | 3.8 | 4.25 | 4.55 | 3.85 |
| Avg | 2.791 | 2.794 | 2.835 | 2.770a**, b* | 2.694a**, c** | 2.841b*, c** |
